# Supplementary material for: A Case of a Malignant Lymphoma Patient Persistently Infected with SARS-CoV-2 for More than 6 Months
Source: MDPI journal article supplement (doi:10.3390/medicina59010108), 2023-01-04
Supplement: s1 [file s1]

Table S1. Worldwide representative SARS-CoV-2 sequences registered in GISAID (<https://www.gisaid.org>) from September 2020 to March 2021.

| No. | Collection Date | GISAID Accession Number | Viral Name                                 | Region        | Country              |
|-----|-----------------|-------------------------|--------------------------------------------|---------------|----------------------|
| 1   | 2021-02-08      | EPI_ISL_1425429         | hCoV-19/Japan/PG-25371/2021                | Asia          | Japan                |
| 2   | 2020-12-26      | EPI_ISL_1168867         | hCoV-19/Japan/PG-17557/2020                | Asia          | Japan                |
| 3   | 2020-10-31      | EPI_ISL_1431453         | hCoV-19/Japan/PG-27364/2020                | Asia          | Japan                |
| 4   | 2020-12-26      | EPI_ISL_2498317         | hCoV-19/USA/MT-WL-787/2020                 | North America | Canada               |
| 5   | 2020-10-29      | EPI_ISL_8876129         | hCoV-19/USA/MT-WL-787/2020                 | North America | USA                  |
| 6   | 2020-12-31      | EPI_ISL_1122088         | hCoV-19/USA/OR-OHSU-8861/2020              | North America | USA                  |
| 7   | 2020-12-09      | EPI_ISL_731649          | hCoV-19/England/ALDP-C3AFD7/2020           | Europe        | United Kingdom       |
| 8   | 2020-09-24      | EPI_ISL_580090          | hCoV-19/England/ALDP-9EAC0F/2020           | Europe        | United Kingdom       |
| 9   | 2020-12-14      | EPI_ISL_1895002         | hCoV-19/Denmark/DCGC-85683/2020            | Europe        | Denmark              |
| 10  | 2021-03-11      | EPI_ISL_1367383         | hCoV-19/USA/OH-CDC-QDX22904787/2021        | North America | USA                  |
| 11  | 2020-09-16      | EPI_ISL_566175          | hCoV-19/England/ALDP-9CDB05/2020           | Europe        | United Kingdom       |
| 12  | 2021-02-10      | EPI_ISL_4964957         | hCoV-19/USA/NY-CDC-LC0017051/2021          | North America | USA                  |
| 13  | 2020-12-30      | EPI_ISL_1427139         | hCoV-19/Japan/PG-22363/2020                | Asia          | Japan                |
| 14  | 2021-03-29      | EPI_ISL_1597109         | hCoV-19/Netherlands/OV-RIVM-24229/2021     | Europe        | Netherlands          |
| 15  | 2020-12-28      | EPI_ISL_5143139         | hCoV-19/United_Arab_Emirates/BTC-4593/2020 | Asia          | United Arab Emirates |
| 16  | 2020-09-24      | EPI_ISL_639971          | hCoV-19/Russia/SVE-RII-MH2829S/2020        | Europe        | Russia               |
| 17  | 2020-10-16      | EPI_ISL_2491729         | hCoV-19/Brazil/BA-FIOCRUZ-33273/2020       | South America | Brazil               |
| 18  | 2020-12-17      | EPI_ISL_1423912         | hCoV-19/Spain/CT-IBV-98016339/2020         | Europe        | Spain                |
| 19  | 2021-03-03      | EPI_ISL_8593673         | hCoV-19/Italy/TAA-7830034987/2021          | Europe        | Italy                |
| 20  | 2021-02-01      | EPI_ISL_1091227         | hCoV-19/Croatia/HRV000_30/2021             | Europe        | Croatia              |
| 21  | 2020-11-06      | EPI_ISL_1202956         | hCoV-19/USA/TX-HMH-MCoV-17245/2020         | North America | USA                  |
| 22  | 2021-01-04      | EPI_ISL_2598056         | hCoV-19/USA/MD-MDH-2614/2021               | North America | USA                  |
| 23  | 2021-02-22      | EPI_ISL_1272738         | hCoV-19/USA/WA-CDC-2-3980593/2021          | North America | USA                  |
| 24  | 2021-03-08      | EPI_ISL_1591270         | hCoV-19/Croatia/1227/2021                  | Europe        | Croatia              |
| 25  | 2021-03-27      | EPI_ISL_2535773         | hCoV-19/Malaysia/UNIMAS-16855/2021         | Asia          | Malaysia             |
| 26  | 2021-03-29      | EPI_ISL_1440831         | hCoV-19/Germany/NW-RKI-I-057128/2021       | Europe        | Germany              |
| 27  | 2021-03-15      | EPI_ISL_1755001         | hCoV-19/France/IDF-HMN-21032230485/2021    | Europe        | France               |

Table S2. Representative SARS-CoV-2 sequence from Fukuoka Prefecture, Japan registered in GISAID(<https://www.gisaid.org>) from September 2020 to March 2021.

| No. | GISAID Accession Number | Viral Name                  | Collection Date |
|-----|-------------------------|-----------------------------|-----------------|
| 1   | EPI_ISL_900775          | hCoV-19/Japan/PG-10038/2020 | 2020-09-30      |
| 2   | EPI_ISL_897507          | hCoV-19/Japan/PG-13193/2020 | 2020-11-25      |
| 3   | EPI_ISL_894680          | hCoV-19/Japan/PG-15874/2020 | 2020-11-25      |
| 4   | EPI_ISL_894720          | hCoV-19/Japan/PG-15916/2020 | 2020-12-16      |
| 5   | EPI_ISL_894746          | hCoV-19/Japan/PG-15942/2020 | 2020-12-23      |
| 6   | EPI_ISL_894748          | hCoV-19/Japan/PG-15944/2020 | 2020-12-23      |
| 7   | EPI_ISL_1128441         | hCoV-19/Japan/PG-16439/2020 | 2020-12-23      |
| 8   | EPI_ISL_1128926         | hCoV-19/Japan/PG-16882/2020 | 2020-12-30      |
| 9   | EPI_ISL_1319755         | hCoV-19/Japan/PG-19044/2021 | 2021-01-06      |
| 10  | EPI_ISL_1125030         | hCoV-19/Japan/PG-20425/2021 | 2021-01-06      |
| 11  | EPI_ISL_1125032         | hCoV-19/Japan/PG-20426/2021 | 2021-01-06      |
| 12  | EPI_ISL_1426746         | hCoV-19/Japan/PG-21729/2021 | 2021-01-06      |
| 13  | EPI_ISL_1426795         | hCoV-19/Japan/PG-21781/2021 | 2021-01-13      |
| 14  | EPI_ISL_1472132         | hCoV-19/Japan/PG-22093/2021 | 2021-01-13      |
| 15  | EPI_ISL_1430155         | hCoV-19/Japan/PG-24686/2021 | 2021-01-27      |
| 16  | EPI_ISL_2014929         | hCoV-19/Japan/PG-27489/2021 | 2021-02-10      |
| 17  | EPI_ISL_1472251         | hCoV-19/Japan/PG-29145/2021 | 2021-01-13      |
| 18  | EPI_ISL_2014974         | hCoV-19/Japan/PG-29814/2021 | 2021-03-10      |
| 19  | EPI_ISL_2014999         | hCoV-19/Japan/PG-30022/2021 | 2021-03-03      |
| 20  | EPI_ISL_2015005         | hCoV-19/Japan/PG-30028/2021 | 2021-03-03      |
| 21  | EPI_ISL_1930039         | hCoV-19/Japan/PG-30179/2021 | 2021-03-03      |
| 22  | EPI_ISL_2015027         | hCoV-19/Japan/PG-31600/2021 | 2021-03-03      |
| 23  | EPI_ISL_2015052         | hCoV-19/Japan/PG-32597/2021 | 2021-03-10      |
| 24  | EPI_ISL_3191930         | hCoV-19/Japan/PG-68292/2021 | 2021-01-13      |
| 25  | EPI_ISL_3191997         | hCoV-19/Japan/PG-68524/2021 | 2021-01-13      |
| 26  | EPI_ISL_3199801         | hCoV-19/Japan/PG-71414/2021 | 2021-03-03      |
| 27  | EPI_ISL_3874861         | hCoV-19/Japan/PG-74222/2021 | 2021-01-13      |
| 28  | EPI_ISL_687534*         | hCoV-19/Japan/PG-8435/2020  | 2020-09-11      |
| 29  | EPI_ISL_687551*         | hCoV-19/Japan/PG-8452/2020  | 2020-09-09      |
| 30  | EPI_ISL_687540*         | hCoV-19/Japan/PG-8441/2020  | 2020-09-03      |

\*Sequence of hospital infection clusters.
